# Supplementary material
Source: PubMed Central journal article supplement (PMC3164320)
Supplement: NIHMS315446-supplement-1_si_001.pdf [file NIHMS315446-supplement-1_si_001.pdf]

## Supporting Information

# Design of HIV-1 Protease Inhibitors with C3-Substituted Hexahydrocyclopentafuranyl Urethane as P<sub>2</sub>-Ligands: Synthesis, Biological Evaluation, and Protein-Ligand X-Ray Crystal Structure.

*Arun K. Ghosh, Bruno D. Chapsal, Garth L. Parham, Melinda Steffey, Jonhson Agniswamy, Yuan-Fang Wang, Irene T. Weber, Masayuki Amano, and Hiroaki Mitsuya.*

### Table of Contents:

|                                                                                                     |    |
|-----------------------------------------------------------------------------------------------------|----|
| Table 1. HPLC Purity of Inhibitors <b>21-31</b> .....                                               | S2 |
| Table 2. High and Low Resolution Mass Spectrometry Data for Inhibitors <b>21</b> to <b>31</b> ..... | S3 |
| Table 3. Crystallographic Data Collection and Refinement Statistics .....                           | S4 |

### HPLC Analytical Purity

**Table 1.** Analytical Purity of Inhibitors **21** to **31** determined by HPLC.

| Inhibitor | Method A             |                 | Method B             |                 |
|-----------|----------------------|-----------------|----------------------|-----------------|
|           | R <sub>t</sub> (min) | Purity (area %) | R <sub>t</sub> (min) | Purity (area %) |
| <b>21</b> | 12.87                | 95.1            | 15.3                 | 95.8            |
| <b>22</b> | 11.54                | 99.1            | 15.03                | 99.3            |
| <b>23</b> | 9.17                 | 95.1            | 12.25                | 95.2            |
| <b>24</b> | 8.82                 | 97.2            | 12.96                | 96.4            |
| <b>25</b> | 13.64                | 97.9            | 16.31                | 97.9            |
| <b>26</b> | 10.45                | 99.9            | 14.54                | 99.9            |
| <b>27</b> | 8.25                 | 98.1            | 11.75                | 98.3            |
| <b>28</b> | 12.92                | 96.8            | 15.97                | 99.9            |
| <b>29</b> | 14.80                | 95.2            | 17.30                | 95.0            |
| <b>30</b> | 15.04                | 97.7            | 17.55                | 95.7            |
| <b>31</b> | 8.97                 | 97.0            | 12.8                 | 99.2            |

#### HPLC conditions:

**Method A** = Agilent Eclipse XDB-C18 (4.6 x 150 mm, 5  $\mu$ m); t = 0-1 min (MeCN:H<sub>2</sub>O:TFA 20:80:0.05), t = 1-20 min (*gradient to* MeCN:H<sub>2</sub>O:TFA 90:10:0.05), t = 20-25 min (MeCN:H<sub>2</sub>O:TFA 90:10:0.05); Flow = 1.5 mL/min; single detection wavelength  $\lambda$  = 215 nm, T = 25 °C, injection volume 30  $\mu$ L, 10 min equilibration time between run.

**Method B** = Agilent Eclipse XDB-C18 (4.6 x 150 mm, 5  $\mu$ m); t = 0-1 min (MeOH:H<sub>2</sub>O:TFA 25:75:0.05), t = 1-20 min (*gradient to* MeOH:H<sub>2</sub>O:TFA 95:5:0.05), t = 20-25 min (MeOH:H<sub>2</sub>O:TFA 95:5:0.05); Flow = 1.5 mL/min; single detection wavelength  $\lambda$  = 215 nm, T = 25 °C, injection volume 30  $\mu$ L, 10 min equilibration time between run.

### Mass Spectrometry Data

**Table 2.** High and Low Resolution Mass Spectrometry Data for Inhibitors **21** to **31**.

| Inhibitor | Molecular Formula                                               | HRMS Technique | Ion                 | Calculated | Found    |
|-----------|-----------------------------------------------------------------|----------------|---------------------|------------|----------|
| <b>21</b> | C <sub>29</sub> H <sub>38</sub> N <sub>2</sub> O <sub>8</sub> S | ESI            | [M+Na] <sup>+</sup> | 597.2247   | 597.2251 |
| <b>22</b> | C <sub>29</sub> H <sub>40</sub> N <sub>2</sub> O <sub>8</sub> S | LRMS-ESI       | [M+Na] <sup>+</sup> | 599.2      | 599.3    |
| <b>23</b> | C <sub>28</sub> H <sub>39</sub> N <sub>3</sub> O <sub>7</sub> S | ESI            | [M+Na] <sup>+</sup> | 584.2406   | 584.2410 |
| <b>24</b> | C <sub>29</sub> H <sub>40</sub> N <sub>2</sub> O <sub>8</sub> S | ESI            | [M+Na] <sup>+</sup> | 599.2403   | 599.2401 |
| <b>25</b> | C <sub>30</sub> H <sub>42</sub> N <sub>2</sub> O <sub>8</sub> S | ESI            | [M+H] <sup>+</sup>  | 591.2740   | 591.2742 |
| <b>26</b> | C <sub>29</sub> H <sub>40</sub> N <sub>2</sub> O <sub>8</sub> S | ESI            | [M+H] <sup>+</sup>  | 577.2584   | 577.2572 |
| <b>27</b> | C <sub>28</sub> H <sub>39</sub> N <sub>3</sub> O <sub>7</sub> S | ESI            | [M+Na] <sup>+</sup> | 584.2406   | 584.2398 |
| <b>28</b> | C <sub>30</sub> H <sub>42</sub> N <sub>2</sub> O <sub>8</sub> S | ESI            | [M+Na] <sup>+</sup> | 613.2560   | 613.2555 |
| <b>29</b> | C <sub>28</sub> H <sub>39</sub> N <sub>3</sub> O <sub>7</sub> S | LRMS- ESI      | [M+H] <sup>+</sup>  | 575.3      | 575.1    |
| <b>30</b> | C <sub>29</sub> H <sub>40</sub> N <sub>2</sub> O <sub>8</sub> S | LRMS- ESI      | [M+H] <sup>+</sup>  | 575.3      | 575.1    |
| <b>31</b> | C <sub>31</sub> H <sub>45</sub> N <sub>3</sub> O <sub>7</sub> S | LRMS-ESI       | [M+H] <sup>+</sup>  | 604.8      | 604.3    |

### *Crystallographic Data Collection and Refinement Statistics*

**Table 3.** Crystallographic Data Collection and Refinement Statistics

|                                              | <b>PR-GRL-0489A</b>              |
|----------------------------------------------|----------------------------------|
| Space group                                  | P2 <sub>1</sub> 2 <sub>1</sub> 2 |
| Unit cell dimensions: (Å)                    |                                  |
| A                                            | 58.39                            |
| B                                            | 86.55                            |
| C                                            | 45.85                            |
| Resolution range (Å)                         | 50-1.45                          |
| Unique reflections                           | 41,487                           |
| R <sub>merge</sub> (%) overall (final shell) | 7.2 (41.8)                       |
| I/σ(I) overall (final shell)                 | 16.0 (2.0)                       |
| Completeness (%) overall (final shell)       | 98.4 (88.5)                      |
| Data range for refinement (Å)                | 10-1.45                          |
| R (%)                                        | 16.0                             |
| R <sub>free</sub> (%)                        | 21.9                             |
| No. of solvent atoms                         | 142                              |
| RMS deviation from ideality                  |                                  |
| Bonds (Å)                                    | 0.010                            |
| Angle distance (Å)                           | 0.029                            |
| Average B-factors (Å <sup>2</sup> )          |                                  |
| Main-chain atoms                             | 17.4                             |
| Side-chain atoms                             | 23.6                             |
| Inhibitor                                    | 14.1                             |
| Solvent                                      | 26.2                             |
